# Supplementary material for: Caveolin-1 Modulates Mechanotransduction Responses to Substrate Stiffness through Actin-Dependent Control of YAP
Source: PubMed Central journal article supplement (PMC6231326; doi:10.1016/j.celrep.2018.10.024), 2018-11-06
Supplement: mmc1.pdf [file mmc1.pdf]

**Cell Reports, Volume 25**

**Supplemental Information**

**Caveolin-1 Modulates Mechanotransduction**

**Responses to Substrate Stiffness**

**through Actin-Dependent Control of YAP**

**Roberto Moreno-Vicente, Dácil María Pavón, Inés Martín-Padura, Mauro Català-Montoro, Alberto Díez-Sánchez, Antonio Quílez-Álvarez, Juan Antonio López, Miguel Sánchez-Álvarez, Jesús Vázquez, Raffaele Strippoli, and Miguel A. del Pozo**

**Figure S1**

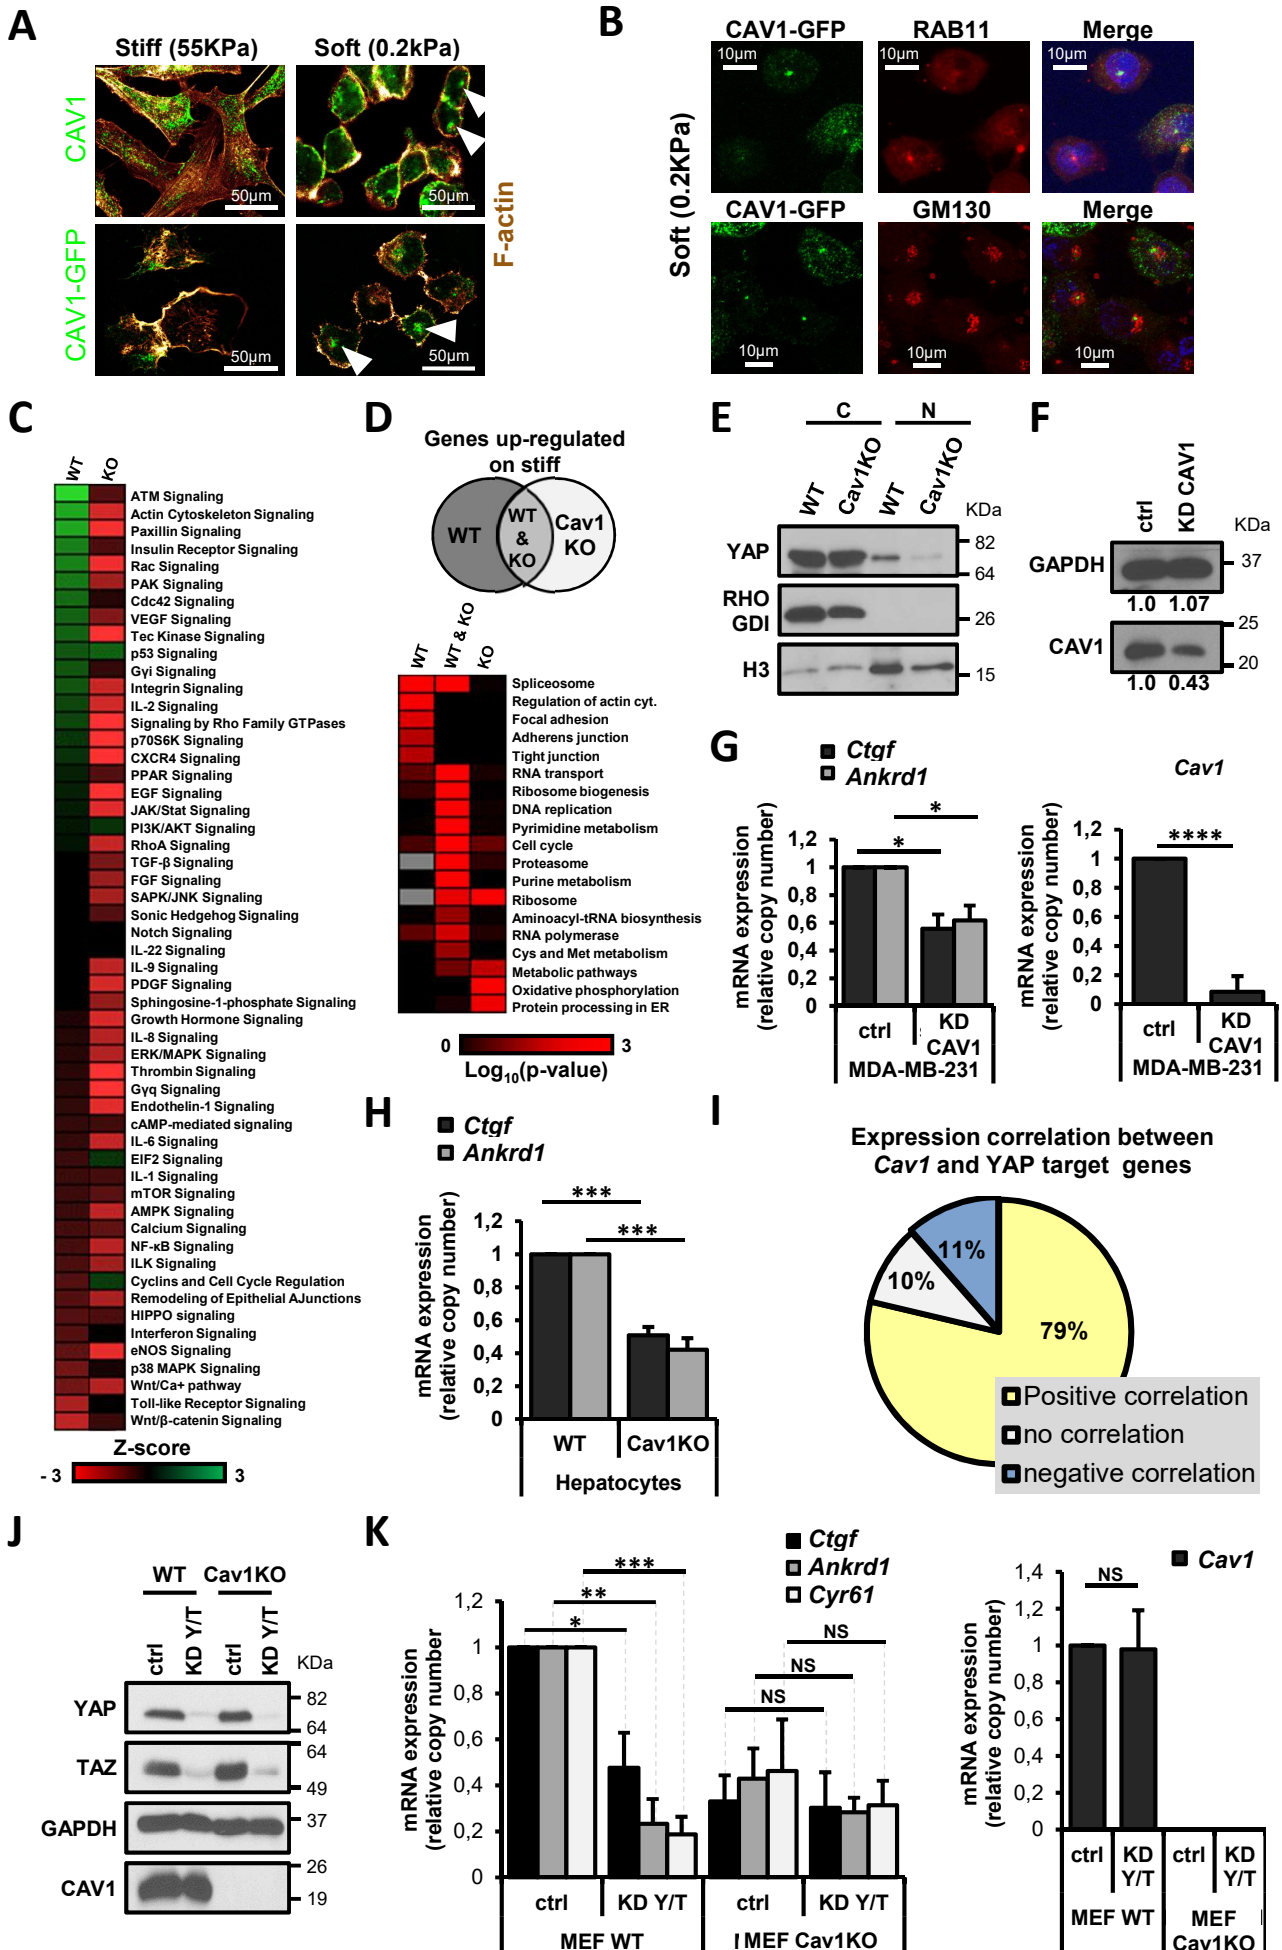

**Figure S1. Cav1 controls the expression of cytoskeletal regulatory genes and YAP targets. (Related to Figure 1)** (A) Confocal immunofluorescence images of CAV1 and phalloidine staining in HeLa cells (upper panels) and CAV1-GFP expressing cells (lower panels) grown on stiff or soft substrates for 24 hours. Arrowheads mark the intracellular accumulation of CAV1 in soft conditions. (B) Confocal immunofluorescence images of CAV1-GFP, RAB11 (recycling endosome marker) and GM130 (Golgi marker). (C) Computational analysis using IPA software to detect canonical pathways regulated by matrix stiffness. mRNA expression in cells on rigid (55KPa) or compliant (0.22KPa) polyacrylamide hydrogels was assessed by RNA-Seq. Genes significantly up- or down-regulated by matrix stiffness in WT or Cav1KO MEFs were analyzed. Activation Z-scores are color-coded for each genotype. Positive values (green) indicate activation after exposure to rigid substrate, whereas negative values (red) indicate pathway inhibition. (D) *Top*, Venn diagram showing genes up-regulated in WT and Cav1KO MEFs grown on stiff substrates in the RNA-Seq study. *Bottom*, KEGG-term enrichment between genes up-regulated in stiff conditions in WT MEFs, Cav1KO MEFs, and both genotypes (bottom). (E) YAP western blot in nuclear and cytosolic fractions of WT and Cav1KO MEFs grown on stiff substrates. RHO-GDI and Histone H3 were used as cytosolic and nuclear internal controls. (F) Western blot of CAV1 in MDA-MB-231 cells transfected with CAV1 or control siRNAs. (G) qRT-PCR analysis of *Ctgf*, *Ankrd1*, and *Cav1* mRNA expression in MDA-MB-231 cells transfected with control or CAV1 siRNAs. Data are normalized to the control condition (n=4). (H) qRT-PCR analysis of *Ctgf* and *Ankrd1* mRNA expression in WT and Cav1KO mouse neonatal hepatocytes. Data are normalized to values in WT cells for each experiment. n = 4. (I) Relative distributions of YAP target genes showing positive, negative, or zero expression correlation with *Cav1* across 300 cell lines (p-value > 0.05). (J and K) Western blot (J) and qRT-PCR (K) analysis of YAP targets (*Ctgf*, *Ankrd1*, and *Cyr61*) and *Cav1* expression in cells transfected with control or YAP/TAZ-targeting siRNAs. For qRT-PCR analysis, data are normalized to WT cells grown on stiff substrate. n=3. Data are presented as means  $\pm$ SEM; \*P<0.05, \*\*P<0.01, \*\*\*P<0.005.

## Figure S2

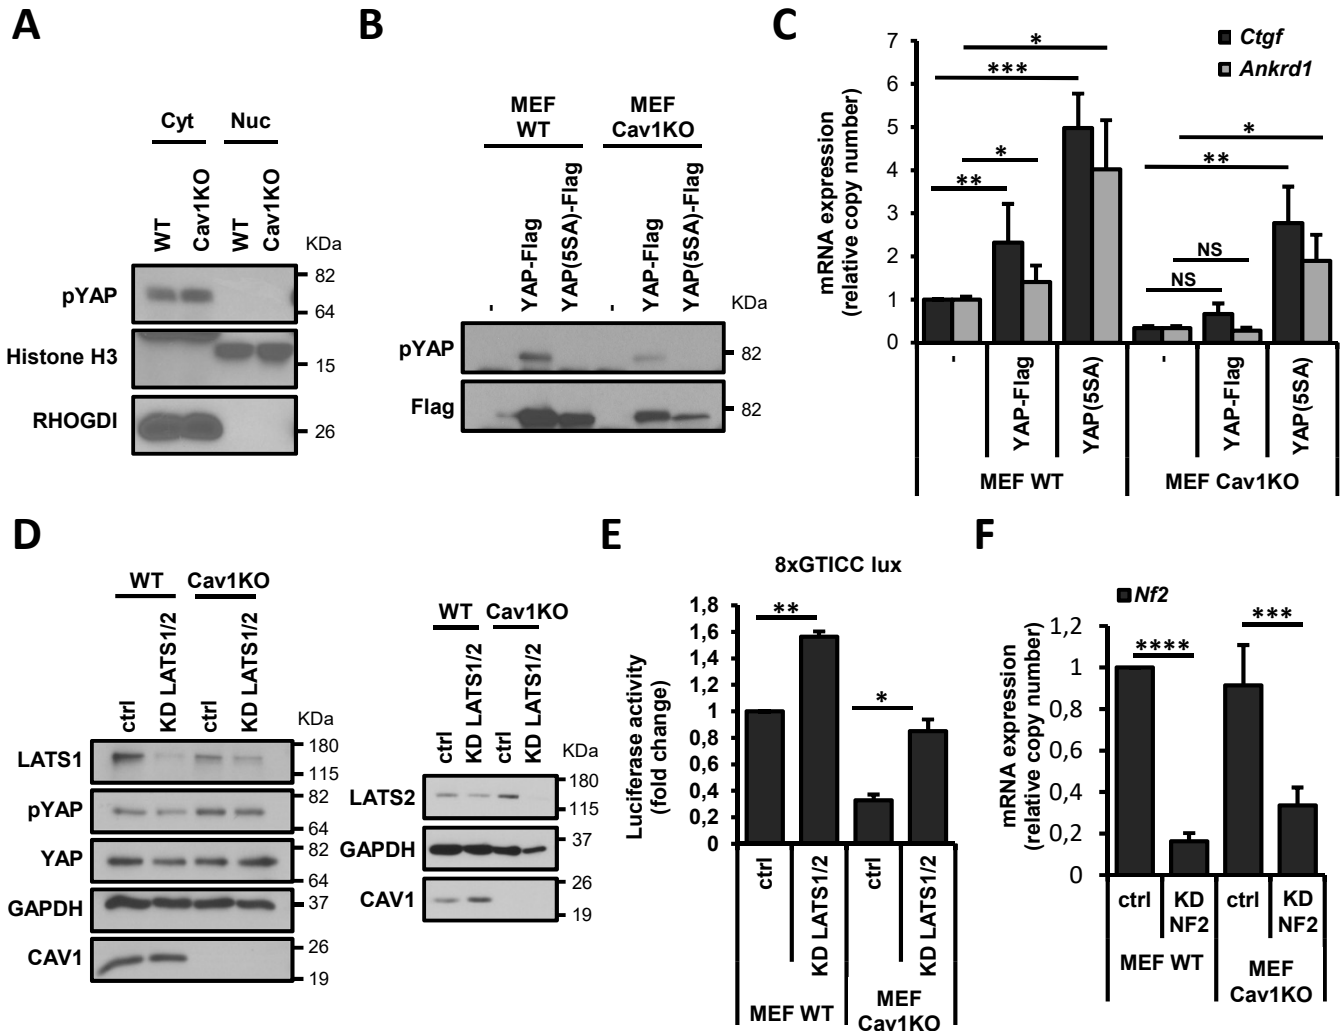

**Figure S2. Hippo-kinase-independent YAP phosphorylation determines deficient YAP activity in Cav1KO cells. (Related to Figure 2)** (A) Western blot analysis of the subcellular distribution of YAP phosphorylated on Ser112. Nuclear and cytosolic fractions were separated by biochemical fractionation. RHO-GDI and Histone H3 were used as cytosolic and nuclear internal controls. (B) Western blot for Flag in WT and Cav1KO MEFs transfected with YAP-Flag or YAP(5SA)-Flag. YAP phosphorylated on Ser112 migrated to the same position as the YAP constructs (which are larger than endogenous YAP) (C) qRT-PCR analysis of *Ctgf* and *Ankrd1* expression in cells transfected with YAP-Flag or YAP(5SA)-Flag. Data are normalized to WT control. n=4. (D) Western blot for LATS1 and 2, CAV1, S112-phosphorylated YAP, and total YAP in MEFs transfected with control or LATS1/2 siRNAs. GAPDH was used as an internal control. (E) TEAD transcriptional activity measured by 8xGTICC-luciferase reporter assay in cells transfected with control or LATS1/2 siRNAs. Data are normalized to WT control. n=3. (F) qRT-PCR analysis of *Nf2* expression in WT and Cav1 KO MEFs transfected with control or NF2 siRNAs. Data are normalized to WT control. n=4. Data are presented as means  $\pm$ SEM. \*P<0.05, \*\*P<0.01, \*\*\*P<0.005, \*\*\*\*P<0.0005.

**Figure S3**

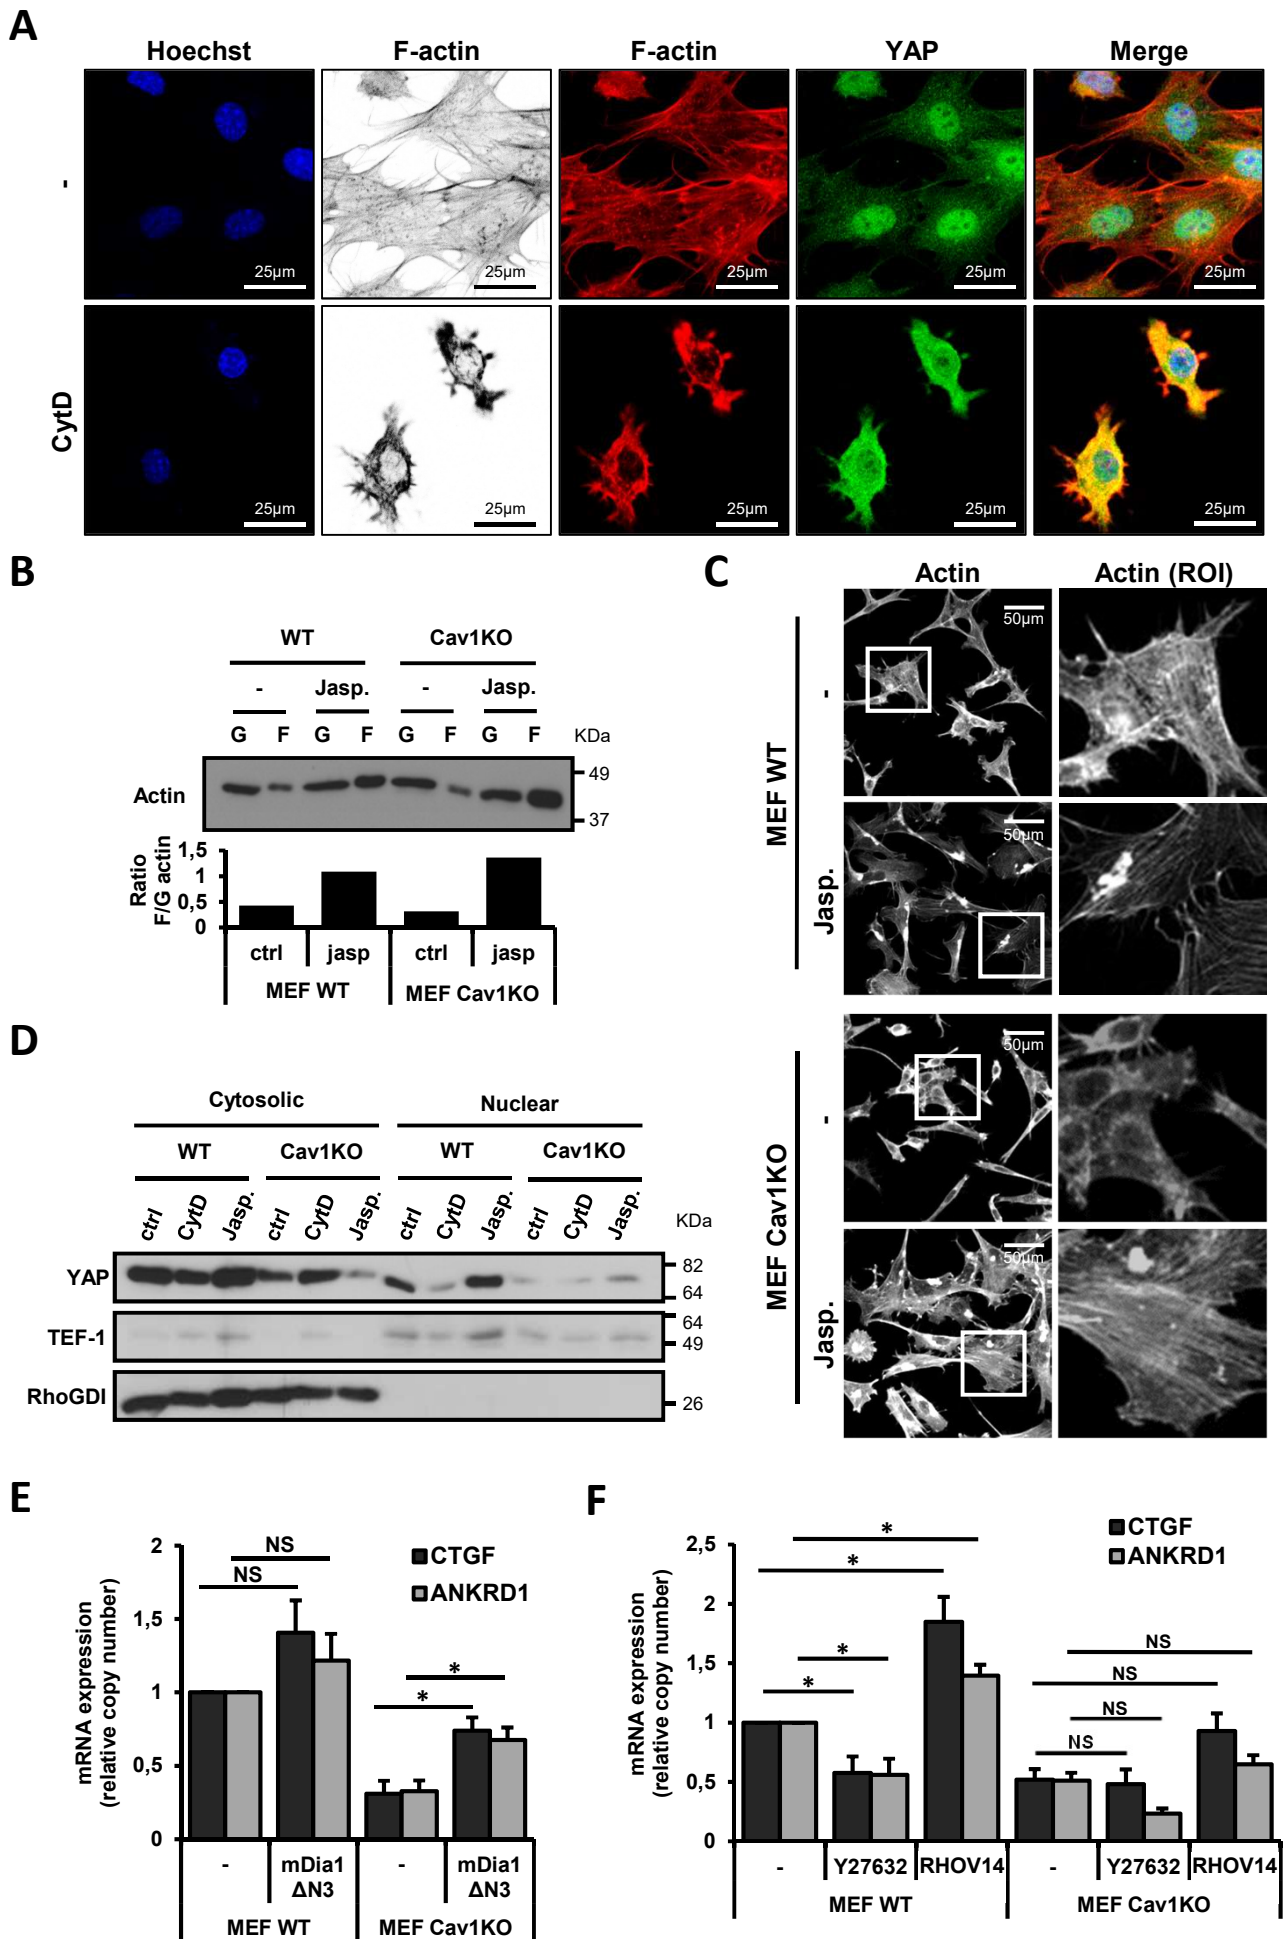

**Figure S3. Altered actin dynamics, but not RhoA function, are a direct cause of the reduced YAP activity in Cav1KO MEFs (Related to Figure 3)** (A) Confocal immunofluorescence images of YAP and phalloidin staining in cells treated for 24 hours with CytD (1 $\mu$ M) or DMSO. (B) Western blot for filamentous (F) and globular (G) actin in MEFs treated for 24 hours with 0.05 $\mu$ M jasplakinolide (Jasp.) or DMSO. F and G-actin were separated using an in vitro assay kit. Bottom graph showing the ratio between filamentous and globular actin. (C) Phalloidin staining in cells treated for 24 hours with 0.05 $\mu$ M jasplakinolide (Jasp.) or DMSO. Zoomed views of the selected ROIs (white squares) are shown on the right. YAP immunostaining is shown in **Figure 3E**. (D) YAP subcellular distribution in WT and Cav1KO MEFs treated for 24 hours with 1  $\mu$ M Cytochalasin D (CytD) or 0.05 $\mu$ M jasplakinolide (jasp). Nuclear and cytosolic fractions were separated by biochemical fractionation. RHO-GDI and TEF-1 were used as cytosolic and nuclear markers, respectively. (E) qRT-PCR analysis of *Ctgf* and *Ankrd1* in cells transfected with a constitutively active form of *DIAPH1* (mDia1 $\Delta$ N3) or mock-transfected. Data are normalized to WT mock-transfected. n =5. (F) qRT-PCR analysis of *Ctgf* and *Ankrd1* in cells transfected with a constitutively active RHOA mutant (RHOV14) or treated with the ROCK inhibitor Y27632 for 24 hours. Data are normalized to WT control. n=4. Data in E and F are presented as means  $\pm$ SEM. \*P<0.05.



**Figure S4**

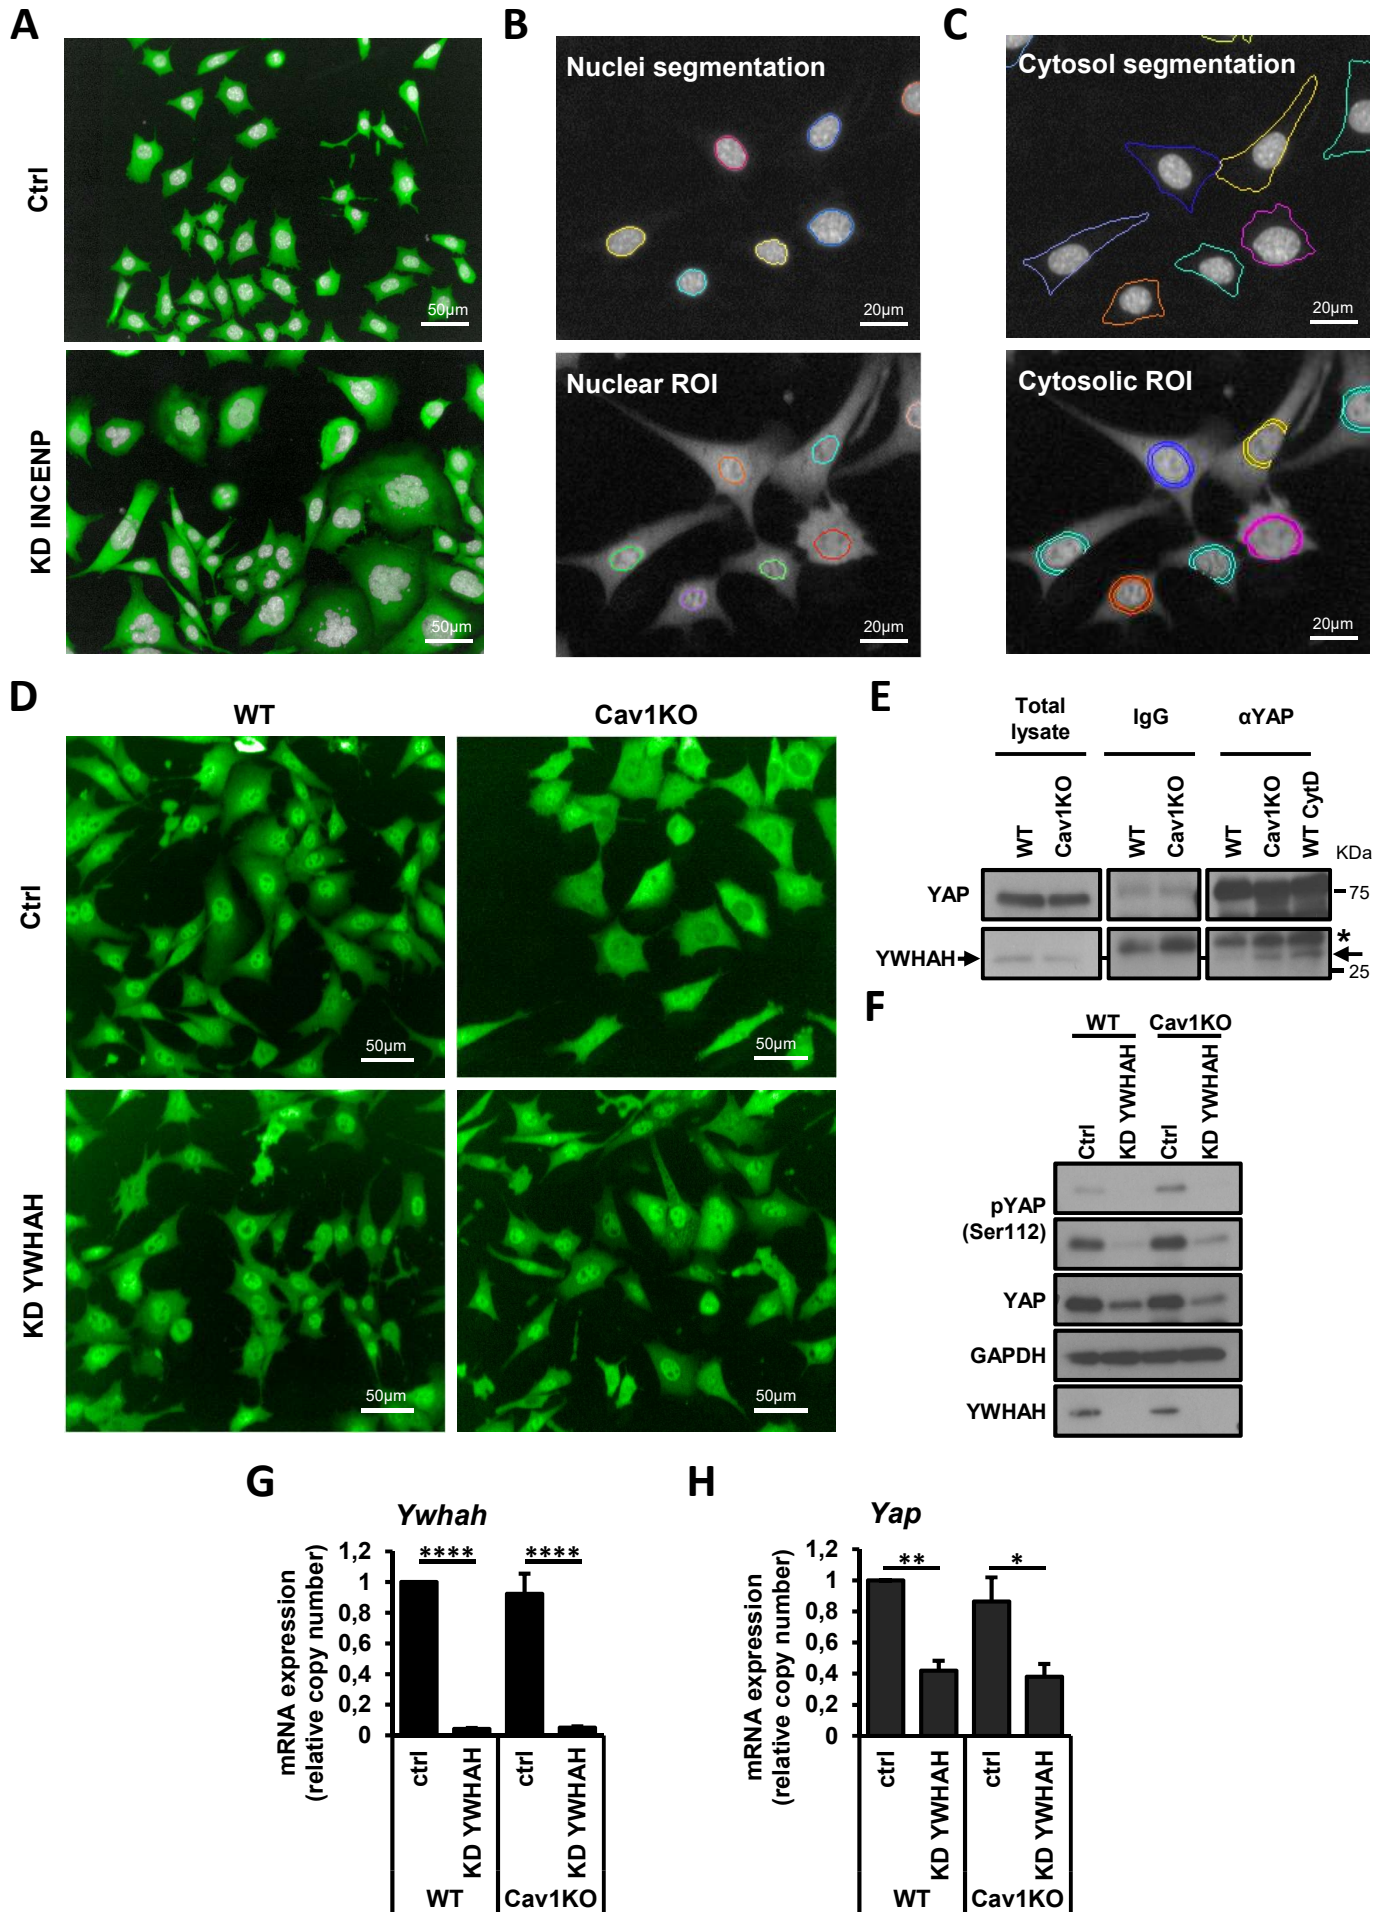

**Figure S4. Functional analysis of YAP interactors by image-based screening. (Related to Figure 4)** (A) Representative images of YAP staining in cells transfected with control or INCENP siRNAs from the image-based screen. (B) Example of nuclear segmentation with Columbus™ using Hoechst staining (top) and the ROI used for YAP nuclear intensity calculation based on that segmentation (bottom). (C) Cytosolic segmentation with Columbus (top) and the ROI around the nuclei used for YAP cytosolic intensity calculation (bottom). (D) Representative images of YAP staining in WT and Cav1KO MEFs transfected with control siRNAs or YWHAH siRNAs identified in the image-based screen. (E) Co-immunoprecipitation of YWHAH with anti-YAP in WT and Cav1KO MEFs treated for 24 h with or without 1μM CytD. Negative controls (IgG) were performed in parallel, using a nonspecific IgG instead of anti-YAP antibody. The asterisk marks a nonspecific band. (F) Western blot analysis of WT and Cav1KO cells transfected with control or YWHAH siRNAs. (G and H) qRT-PCR analysis of *Ywhah* (G) and *Yap* (H) in WT and Cav1KO MEFs transfected with control or YWHAH siRNAs. n=5. Data are represented as means ±SEM. \*P<0.05, \*\*P<0.01, \*\*\*\*P<0.0005.



**Figure S5**

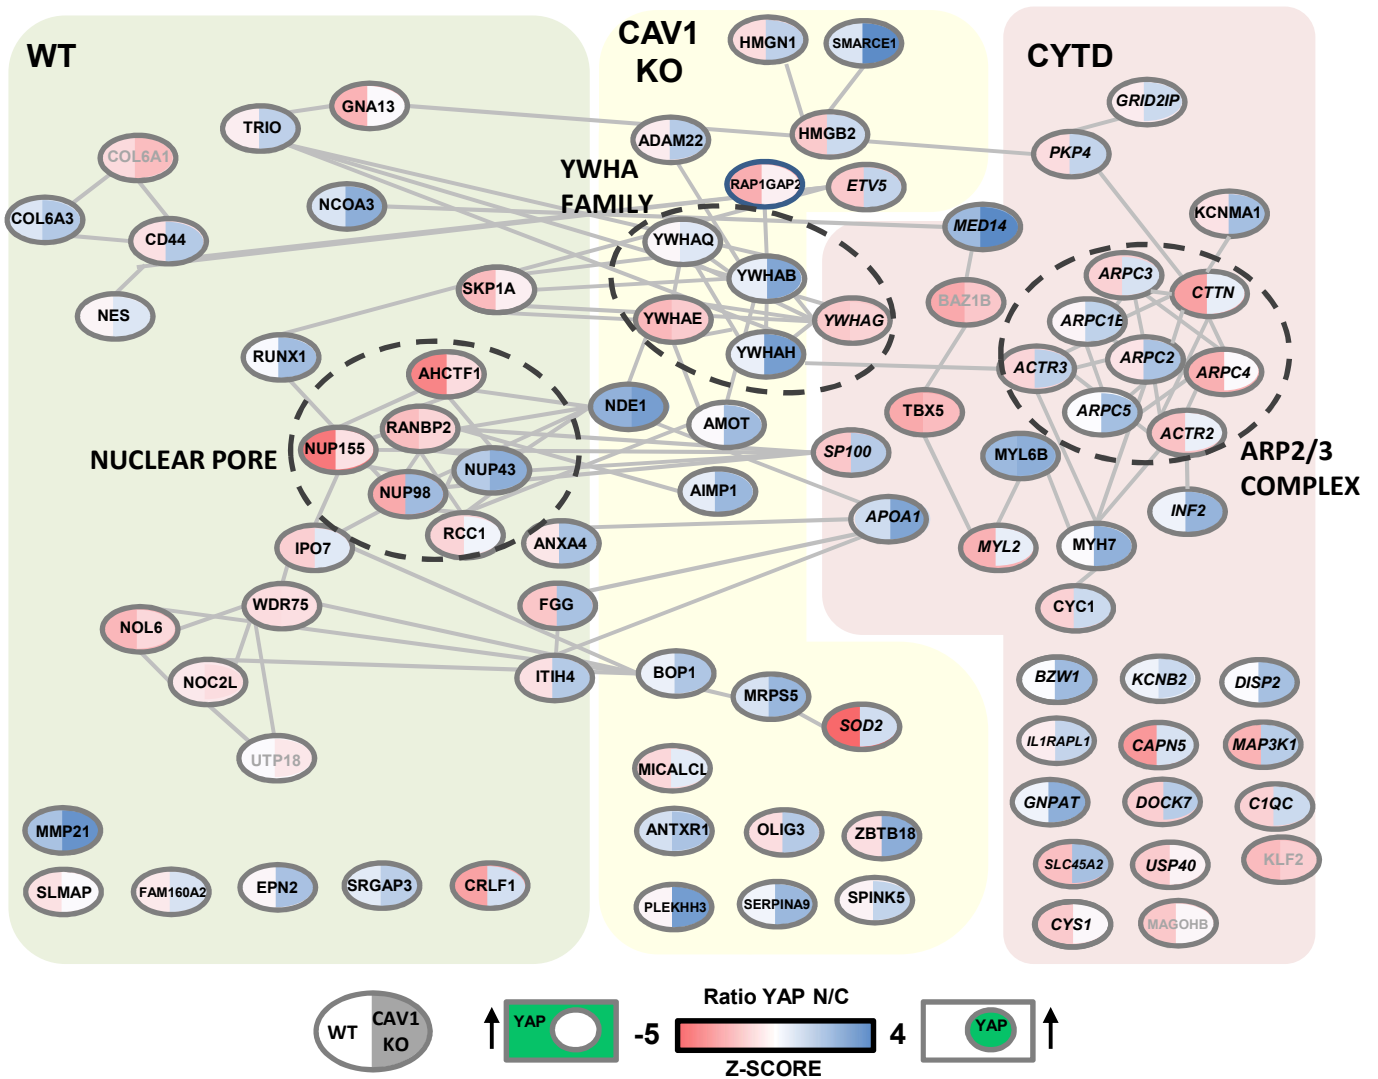

**Figure S5. YAP interactome characterization in WT and Cav1KO MEFs. (Related to Figure 4)** Functional protein association network based on data from STRING (Szklarczyk et al., 2017), including YAP interactors identified by mass spectrometry in untreated WT MEFs (green region) and Cav1KO MEFs (yellow region) and WT or Cav1KO MEFs treated with CytD (red region). For each gene, the image-based siRNA screen results are indicated as a color code representing the mean Z-score of the YAP nuclear:cytosolic ratio in WT (left side of the node) and Cav1KO cells (right side of the node). n=3.

## Figure S6

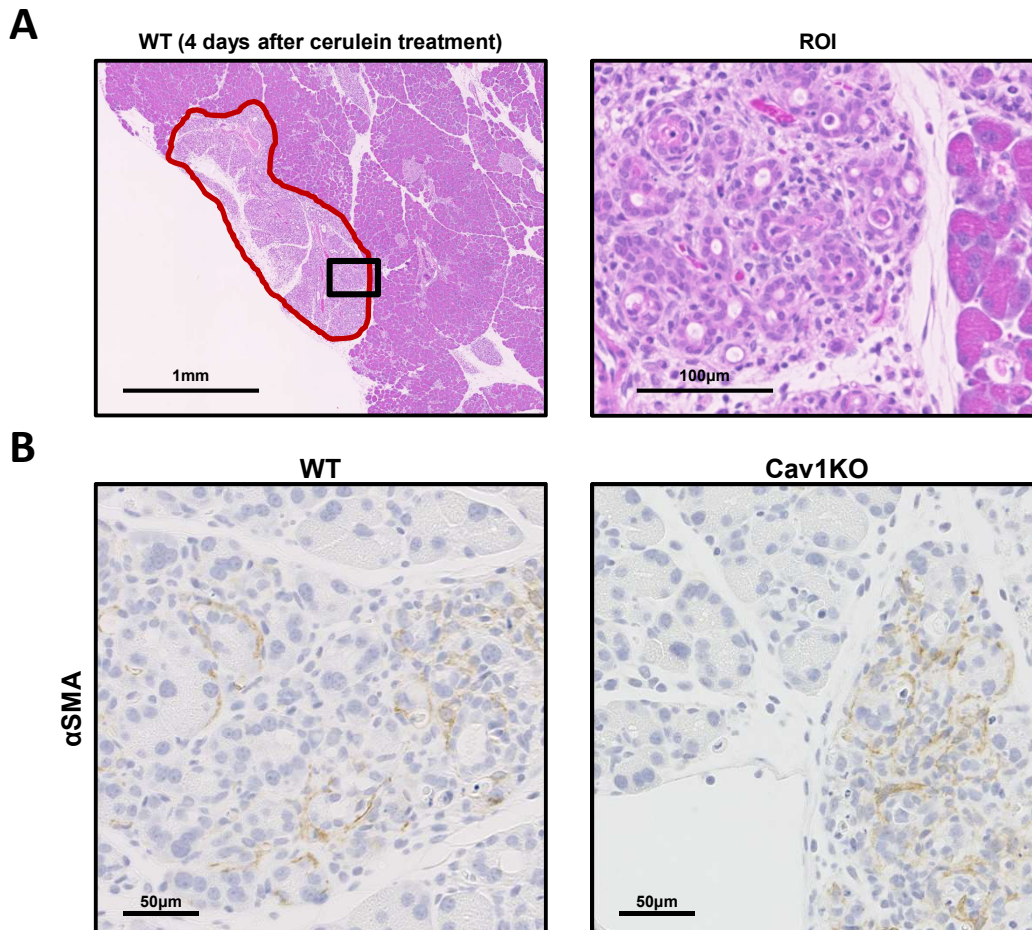

**Figure S6. Mouse pancreatic regions presenting extensive ADM and fibrosis after caerulein treatment. (Related to Figure 6)** (A) H&E staining. Damaged regions observed 4 days after caerulein administration in WT mice. The red line encloses a region presenting extensive acinar-to-ductal metaplasia (ADM). The right panel shows a zoomed view of the boxed ROI in the left image. (B) Immunohistochemistry analysis of  $\alpha$ SMA expression in pancreatic tissue of WT and Cav1KO mice 4 days after caerulein treatment.

**Table S3. List of siRNAs used. (Related to STAR Methods)**

| ON-Target Plus Smart-pool siRNAs                   |                 |
|----------------------------------------------------|-----------------|
| siRNA                                              | IDENTIFIER      |
| ON-Target Plus Smart-pool siRNA targeting YAP      | Cat#L-046247-01 |
| ON-Target Plus Smart-pool siRNA targeting TAZ      | Cat#L-041057-01 |
| ON-Target Plus Smart-pool siRNA targeting LATS1    | Cat#L-063467-01 |
| ON-Target Plus Smart-pool siRNA targeting LATS2    | Cat#L-044602-01 |
| ON-Target Plus Smart-pool siRNA targeting Nf2      | Cat#L-061566-00 |
| ON-Target Plus Smart-pool siRNA targeting Ywhah    | Cat#L-043652-01 |
| ON-Target Plus Smart-pool siRNA targeting Nes      | Cat#L-057300-01 |
| ON-Target Plus Smart-pool siRNA targeting Ywhae    | Cat#L-062431-01 |
| ON-Target Plus Smart-pool siRNA targeting Baz1b    | Cat#L-047645-01 |
| ON-Target Plus Smart-pool siRNA targeting Ywhag    | Cat#L-059307-01 |
| ON-Target Plus Smart-pool siRNA targeting Col6a1   | Cat#L-043147-01 |
| ON-Target Plus Smart-pool siRNA targeting Noc2l    | Cat#L-047536-02 |
| ON-Target Plus Smart-pool siRNA targeting Wdr75    | Cat#L-045131-01 |
| ON-Target Plus Smart-pool siRNA targeting Utp18    | Cat#L-064167-01 |
| ON-Target Plus Smart-pool siRNA targeting Klf2     | Cat#L-046974-01 |
| ON-Target Plus Smart-pool siRNA targeting Nol6     | Cat#L-052204-01 |
| ON-Target Plus Smart-pool siRNA targeting Gna13    | Cat#L-041077-00 |
| ON-Target Plus Smart-pool siRNA targeting Itih4    | Cat#L-046212-01 |
| ON-Target Plus Smart-pool siRNA targeting Smap     | Cat#L-059668-01 |
| ON-Target Plus Smart-pool siRNA targeting Magohb   | Cat#L-047702-01 |
| ON-Target Plus Smart-pool siRNA targeting Nup155   | Cat#L-059426-01 |
| ON-Target Plus Smart-pool siRNA targeting C1qc     | Cat#L-043163-01 |
| ON-Target Plus Smart-pool siRNA targeting Ranbp2   | Cat#L-042297-01 |
| ON-Target Plus Smart-pool siRNA targeting Bop1     | Cat#L-058593-01 |
| ON-Target Plus Smart-pool siRNA targeting Ahctf1   | Cat#L-051465-02 |
| ON-Target Plus Smart-pool siRNA targeting Fam160a2 | Cat#L-042848-01 |
| ON-Target Plus Smart-pool siRNA targeting Skp1a    | Cat#L-060546-00 |
| ON-Target Plus Smart-pool siRNA targeting Ipo7     | Cat#L-058357-01 |
| ON-Target Plus Smart-pool siRNA targeting Rcc1     | Cat#L-051808-01 |
| ON-Target Plus Smart-pool siRNA targeting Nup98    | Cat#L-060137-01 |
| ON-Target Plus Smart-pool siRNA targeting Fgg      | Cat#L-051775-01 |
| ON-Target Plus Smart-pool siRNA targeting Actr3    | Cat#L-046642-01 |
| ON-Target Plus Smart-pool siRNA targeting Ywhaq    | Cat#L-048160-01 |
| ON-Target Plus Smart-pool siRNA targeting Arpc1b   | Cat#L-047321-01 |
| ON-Target Plus Smart-pool siRNA targeting Actr2    | Cat#L-053600-01 |
| ON-Target Plus Smart-pool siRNA targeting Arpc4    | Cat#L-044870-01 |
| ON-Target Plus Smart-pool siRNA targeting Ywhah    | Cat#L-043652-01 |
| ON-Target Plus Smart-pool siRNA targeting Hmgn1    | Cat#L-054969-00 |
| ON-Target Plus Smart-pool siRNA targeting Il1rapl1 | Cat#L-066757-01 |
| ON-Target Plus Smart-pool siRNA targeting Nup43    | Cat#L-052646-01 |
| ON-Target Plus Smart-pool siRNA targeting Trio     | Cat#L-065649-00 |
| ON-Target Plus Smart-pool siRNA targeting Cd44     | Cat#L-041132-01 |
| ON-Target Plus Smart-pool siRNA targeting Col6a3   | Cat#L-065699-01 |
| ON-Target Plus Smart-pool siRNA targeting Runx1    | Cat#L-048982-00 |
| ON-Target Plus Smart-pool siRNA targeting Anxa4    | Cat#L-057375-00 |
| ON-Target Plus Smart-pool siRNA targeting Srgap3   | Cat#L-058941-01 |
| ON-Target Plus Smart-pool siRNA targeting Crlf1    | Cat#L-042918-01 |
| ON-Target Plus Smart-pool siRNA targeting Epn2     | Cat#L-043345-01 |
| ON-Target Plus Smart-pool siRNA targeting Mmp21    | Cat#L-054472-01 |
| ON-Target Plus Smart-pool siRNA targeting Ncoa3    | Cat#L-047722-02 |
| ON-Target Plus Smart-pool siRNA targeting Ywhab    | Cat#L-059298-01 |
| ON-Target Plus Smart-pool siRNA targeting Inf2     | Cat#L-042811-01 |
| ON-Target Plus Smart-pool siRNA targeting Mrps5    | Cat#L-046026-01 |
| ON-Target Plus Smart-pool siRNA targeting Myl6b    | Cat#L-054158-01 |
| ON-Target Plus Smart-pool siRNA targeting Disp2    | Cat#L-059002-01 |
| ON-Target Plus Smart-pool siRNA targeting Arpc5    | Cat#L-041235-01 |
| ON-Target Plus Smart-pool siRNA targeting Cctn     | Cat#L-044721-00 |
| ON-Target Plus Smart-pool siRNA targeting Hmgb2    | Cat#L-066145-01 |
| ON-Target Plus Smart-pool siRNA targeting Smarce1  | Cat#L-051327-01 |
| ON-Target Plus Smart-pool siRNA targeting Aimp1    | Cat#L-045099-01 |
| ON-Target Plus Smart-pool siRNA targeting Arpc2    | Cat#L-043464-01 |

| ON-Target Plus Smart-pool siRNAs                   |                 |
|----------------------------------------------------|-----------------|
| siRNA                                              | IDENTIFIER      |
| ON-Target Plus Smart-pool siRNA targeting Bzw1     | Cat#L-058621-01 |
| ON-Target Plus Smart-pool siRNA targeting Cyc1     | Cat#L-047759-01 |
| ON-Target Plus Smart-pool siRNA targeting Med14    | Cat#L-057957-01 |
| ON-Target Plus Smart-pool siRNA targeting Gnpat    | Cat#L-040695-01 |
| ON-Target Plus Smart-pool siRNA targeting Kcnb2    | Cat#L-043145-00 |
| ON-Target Plus Smart-pool siRNA targeting Zbtb18   | Cat#L-043562-01 |
| ON-Target Plus Smart-pool siRNA targeting Dock7    | Cat#L-065434-01 |
| ON-Target Plus Smart-pool siRNA targeting Amot     | Cat#L-058986-02 |
| ON-Target Plus Smart-pool siRNA targeting Arpc3    | Cat#L-040765-01 |
| ON-Target Plus Smart-pool siRNA targeting Myh7     | Cat#L-048355-01 |
| ON-Target Plus Smart-pool siRNA targeting Sp100    | Cat#L-043934-01 |
| ON-Target Plus Smart-pool siRNA targeting Pkp4     | Cat#L-045923-01 |
| ON-Target Plus Smart-pool siRNA targeting Apoa1    | Cat#L-042942-01 |
| ON-Target Plus Smart-pool siRNA targeting Nde1     | Cat#L-050911-01 |
| ON-Target Plus Smart-pool siRNA targeting Kcnma1   | Cat#L-041156-00 |
| ON-Target Plus Smart-pool siRNA targeting Sod2     | Cat#L-062893-00 |
| ON-Target Plus Smart-pool siRNA targeting Adam22   | Cat#L-054425-01 |
| ON-Target Plus Smart-pool siRNA targeting Grid2ip  | Cat#L-053712-01 |
| ON-Target Plus Smart-pool siRNA targeting Myl2     | Cat#L-045013-01 |
| ON-Target Plus Smart-pool siRNA targeting Olig3    | Cat#L-048661-01 |
| ON-Target Plus Smart-pool siRNA targeting Plekhh3  | Cat#L-062851-01 |
| ON-Target Plus Smart-pool siRNA targeting Spink5   | Cat#L-055789-01 |
| ON-Target Plus Smart-pool siRNA targeting Antxr1   | Cat#L-048413-01 |
| ON-Target Plus Smart-pool siRNA targeting Micalcl  | Cat#L-172668-00 |
| ON-Target Plus Smart-pool siRNA targeting Serpina9 | Cat#L-041728-01 |
| ON-Target Plus Smart-pool siRNA targeting Tbx5     | Cat#L-044182-01 |
| ON-Target Plus Smart-pool siRNA targeting Cys1     | Cat#L-053758-01 |
| ON-Target Plus Smart-pool siRNA targeting Rap1gap2 | Cat#L-040366-01 |
| ON-Target Plus Smart-pool siRNA targeting Usp40    | Cat#L-043598-01 |
| ON-Target Plus Smart-pool siRNA targeting Slc45a2  | Cat#L-061072-01 |
| ON-Target Plus Smart-pool siRNA targeting Capn5    | Cat#L-042053-01 |
| ON-Target Plus Smart-pool siRNA targeting Etv5     | Cat#L-062952-01 |
| ON-Target Plus Smart-pool siRNA targeting Map3k1   | Cat#L-041090-00 |
| ON-Target Plus Smart-pool siRNA targeting Incenp   | Cat#L-049298-01 |
| ON-Target Plus Smart-pool siRNA Control            | Cat#D-001810-01 |
| ON-Target Plus Smart-pool siRNA Control            | Cat#D-001810-02 |

**Table S4. List of qRT-PCR primers used. (Related to STAR Methods)**

| Human Primers     |                |                         |
|-------------------|----------------|-------------------------|
| Gene              |                | Sequence (5' -> 3')     |
| <i>HPRT1</i>      | Forward Primer | CCTGGCGTCGTGATTAGTGAT   |
|                   | Reverse Primer | AGACGTTTCAGTCCTGTCCATAA |
| <i>Beta-actin</i> | Forward Primer | CACCTTCCAGCAGATGTCTGA   |
|                   | Reverse Primer | AGCATTTCGCGGTGGACGATGG  |
| <i>CTGF</i>       | Forward Primer | ACCGACTGGAAGACACGTTTG   |
|                   | Reverse Primer | CCAGGTCAGCTTCGCAAGG     |
| <i>ANKRD1</i>     | Forward Primer | AGTAGAGGAACTGGTCACTGG   |
|                   | Reverse Primer | TGTTTCTCGCTTTTCCACTGTT  |
| Mouse primers     |                |                         |
| Gene              |                | Sequence (5' -> 3')     |
| <i>Hprt1</i>      | Forward Primer | GCTGGTGAAAAGGACCTCT     |
|                   | Reverse Primer | CACAGGACTAGAACACCTGC    |
| <i>Beta-actin</i> | Forward Primer | AGATGACCCAGATCATGTTTGA  |
|                   | Reverse Primer | CACAGCCTGGATGGCTACGT    |
| <i>Ctgf</i>       | Forward Primer | GGACACCTAAAAATCGCCAAGC  |
|                   | Reverse Primer | ACTTAGCCCTGTATGTCTTCACA |
| <i>Ankrd1</i>     | Forward Primer | GCTGGTAACAGGCAAAAAGAAC  |
|                   | Reverse Primer | CCTCTCGCAGTTTCTCGCT     |
| <i>Cyr61</i>      | Forward Primer | CTGCGCTAAACAACCTCAACGA  |
|                   | Reverse Primer | GCAGATCCCTTTTCAGAGCGG   |
| <i>Cavl</i>       | Forward Primer | CCGCGACCCCAAGCA         |
|                   | Reverse Primer | CTGCAATCACATCTTCAAAGTC  |
